# Supplementary material
Source: Elsevier journal article supplement (https://www.sciencedirect.com/science/article/pii/S2254887413000817)
Supplement: mmc1 [file S2254887413000817:mmc1.doc]

**Appendix Table 1.** Summary of questions and responses.

| **Question** | **Answers** | **Agreement** |
| --- | --- | --- |
| 1. In your opinion, is HCAP caused by microorganisms that are different from those that cause CAP? | a. A high number (up to 30%) of cases of HCAP cared for in IMDs are caused by DTT microorganisms | 92.9% |
| b. The etiology of HCAP is similar to that of CAP | 7.1% |
| 3. Are the PSI and CURB-65 scores useful when deciding the site of care of patients with CAP in IMDs? | a. Risk stratification scores are applicable in IMDs and are useful when selecting the site of care of CAP patients | 88.1% |
| b. The decision on the site of care of CAP patients should be based only on clinical judgment | 11.9% |
| 3. Are the PSI and CURB-65 scores useful when selecting the site of care for patients with HCAP? | a. PSI and CURB-65 scores are useful when deciding site of care for patients with HCAP | 30% |
| b. All patients with HCAP should be hospitalized. | 16% |
| c. Admission of patients with HCAP should be decided clinically on an individual basis | 54% |
| 4. In which patients with CAP or HCAP is it necessary to perform an etiological diagnosis, and which tests should be carried out? | a. Diagnostic testing to establish an etiological diagnosis should be carried out in all patients hospitalized with pneumonia | 76.7% |
| b. Diagnostic testing to establish an etiological diagnosis should be carried out only in selected groups of patients | 23.3% |
| c. Diagnostic testing should always include BCs and determination of urinary antigens for *Legionella pneumophila* serogroup 1 and for *S. pneumoniae* | 88.4% |
| d. BCs should be obtained only from selected patients | 21.6% |
| 5. When is the best time to start antibiotic therapy in patients hospitalized with pneumonia? | a. The first antibiotic dose should be administered within 6 hours from the diagnosis of pneumonia | 100% |
| b. The start of treatment should not interfere with diagnostic testing; therefore, it can be delayed for more than 6 hours | 0 |
| 6. How should patients with HCAP be treated empirically? | a. All patients who fulfilled HCAP criteria should be treated empirically with broad-spectrum antibiotic therapy | 7% |
| b. The empirical antibiotic therapy of patients classified as having HCAP should be tailored to the underlying conditions and severity of pneumonia | 93% |
| 7. Is it necessary to know the etiology before de-escalating antimicrobial therapy in patients with HCAP? | a. De-escalation may be applied only in HCAP patients with known etiology | 16.3% |
| b. De-escalation may be applied in patients with HCAP and in patients with negative results of microbiological techniques but a good clinical response | 83.7% |
| 8. How long should patients with CAP and HCAP be treated? | a. The antimicrobial course for CAP should not be longer than 7 days | 93% |
| b. The antimicrobial course for CAP should not be shorter than 10 days | 7% |
| c. The length of antimicrobial course for HCAP should be similar to that of hospital-acquired pneumonia | 93% |
| d. The length of antimicrobial course for HCAP should be similar to that of CAP | 7% |
| 9. When should a patient with pneumonia be discharged? | a. Patients may be discharged as soon as they become clinically stable and tolerate oral therapy | 76.7% |
| b. Patients should remain under observation in hospital 24-48 hours after becoming clinically stable | 23.3% |
| 10. What is the best strategy in IMDs for preventing future episodes of pneumonia? | a. Screening of vaccination status and, if indicated, recommendations about vaccination should be included in the discharge report | 83.7% |
| b. Prevention of future episodes should be managed exclusively by family physicians. | 16.3% |

**CAP:** community acquired pneumonia; **CURB-65:** confusion, urea, respiratory rate, blood pressure and older than 65 years; **DTT** difficult to treat microorganisms (these include *Pseudomonas aeruginosa*, methicillin resistant *Staphylococcus aureus* and *Enterobacteriaceae*; **HCAP:** healthcare associated pneumonia; **IMDs:** internal medicine departments; **PSI:** pneumonia severity index.

**Appendix table 2: Etiology distribution of healthcare-associated pneumonia in the published series.**

| **Country** | **Authors** | **Period** | **Rate of etiologically diagnosed HCAP** | ***Streptococcus pneumoniae*** | ***M. pneumoniae*** | ***C. pneumoniae*** | ***L. pneumophila*** | ***H. influenzae*** | ***P. aeruginosa*** | **Enterobacteriaceae** | **MRSA** |
| --- | --- | --- | --- | --- | --- | --- | --- | --- | --- | --- | --- |
| USA | Kollef 19 | 2002-2003 | Only CP | 5.5% | - | - | - | 6% | 25% | 15% | 30.6% |
| USA | Micek 32 | 2003-2005 | Only CP | 10% | - | - | 0.2% | 4% | 25% | 20% | 31% |
| Canada | Grenier 34 | 1997-2008 | 37% | 32% | 0.9% | - | - | 15% | 8% | 12% | 2% |
| Japan | Shindo 33 | 2005-2007 | 54.6% | 13.5% | 0 | 0.7% | 0 | 2.8% | 5.7% | 13.4% | 3.5% |
| Spain | Carratala  29 | 2001-2004 | 59% | 28% | 0.8% | 0 | 2.4% | 12% | 2% | 2% | 0.8% |
| Spain | Garcia-Vidal 30 | 2001-2009 | 30% | 39% | 1.2% | - | 1.4% | 17% | 1.4% | 1.2% | 0.2% |
| UK | Chalmers 31 | 2005-2009 | 32.1% | 49.4% | 1.1% | 2.2% | 3.4% | 14.6% | 2.2% | 6.7% | 2.2% |
| Spain | ENEMI study28 | 2009 | 21.1% | 38.5% | 0 | 1.5% | 3.1% | 4.6% | 16.9% | 12.3% | 12.3% |

**HCAP:** healthcare associated pneumonia **MRSA:** methicillin Resistant Staphylococcus aureus **CP:** culture positive (only patients with etiological diagnosis were analyzed).

**Appendix Table 3.** Pneumonia Severity Index (PSI) Algorithm

| **Step 1: Stratify to Risk Class I vs. Risk Classes II-V** | |
| --- | --- |
| **Presence of:** |  |
| Over 50 years of age | Yes/No |
| Altered mental status | Yes/No |
| Pulse ≥125/minute | Yes/No |
| Respiratory rate >30/minute | Yes/No |
| Systolic blood pressure <90 mm Hg | Yes/No |
| Temperature <35°C or ≥40°C | Yes/No |
| **History of:** |  |
| Neoplastic disease | Yes/No |
| Congestive heart failure | Yes/No |
| Cerebrovascular disease | Yes/No |
| Renal disease | Yes/No |
| Liver disease | Yes/No |
| **If any "Yes", then proceed to Step 2, if all "No" then assign to Risk Class I** | |
| **Step 2: Stratify to Risk Class II vs III vs IV vs V** | |
| **Demographics** | **Points Assigned** |
| If Male | +Age (yr) |
| If Female | +Age (yr) - 10 |
| Nursing home resident | +10 |
| **Comorbidity** |  |
| Neoplastic disease | +30 |
| Liver disease | +20 |
| Congestive heart failure | +10 |
| Cerebrovascular disease | +10 |
| Renal disease | +10 |
| **Physical Exam Findings** |  |
| Altered mental status | +20 |
| Pulse ≥125/minute | +20 |
| Respiratory rate >30/minute | +20 |
| Systolic blood pressure <90 mm Hg | +15 |
| Temperature <35°C or ≥40°C | +10 |
| **Lab and Radiographic Findings** |  |
| Arterial pH <7.35 | +30 |
| Blood urea nitrogen ≥30 mg/dl (9 mmol/liter) | +20 |
| Sodium <130 mmol/liter | +20 |
| Glucose ≥250 mg/dl (14 mmol/liter) | +10 |
| Hematocrit <30% | +10 |
| Partial pressure of arterial O2 <60mmHg | +10 |
| Pleural effusion | +10 |
| **∑ <70 = Risk Class II** |  |
| **∑ 71-90 = Risk Class III** |  |
| **∑ 91-130 = Risk Class IV** |  |
| **∑ >130 = Risk Class V** |  |

**Appendix Table 4 .** CURB-65 Algorithm

| **Symptom** | **Points** |
| --- | --- |
| Confusion | 1 |
| Urea>7mmol/l | 1 |
| Respiratory rate>30 | 1 |
| SBP<90mmHg, DBP<60mmHg | 1 |
| Age>=65 | 1 |

**SBP**: systolic blood pressure; **DBP**: diastolic blood pressure.

Appendix table 5. **Criteria of clinical stability**

| - Body temperature ≤37.8ºC - Heart rate ≤100 heartbeats per minute - Respiratory rate ≤24 breaths per minute - Systolic blood pressure ≥90 mmHg - O2 saturation on ambient air ≥90% o PaO2 ≥60 mmHg - Oral tolerance to fluids and solids - Unaltered mental status |
| --- |
